# Supplementary figures and images for: Programmed Cell Death Protein Ligand 2 Is a Potential Biomarker That Predicts the Efficacy of Immunotherapy
Source: Hindawi journal article supplement (doi:10.1155/2021/9453692), 2021-10-31

# CD8+ T Cell Signature

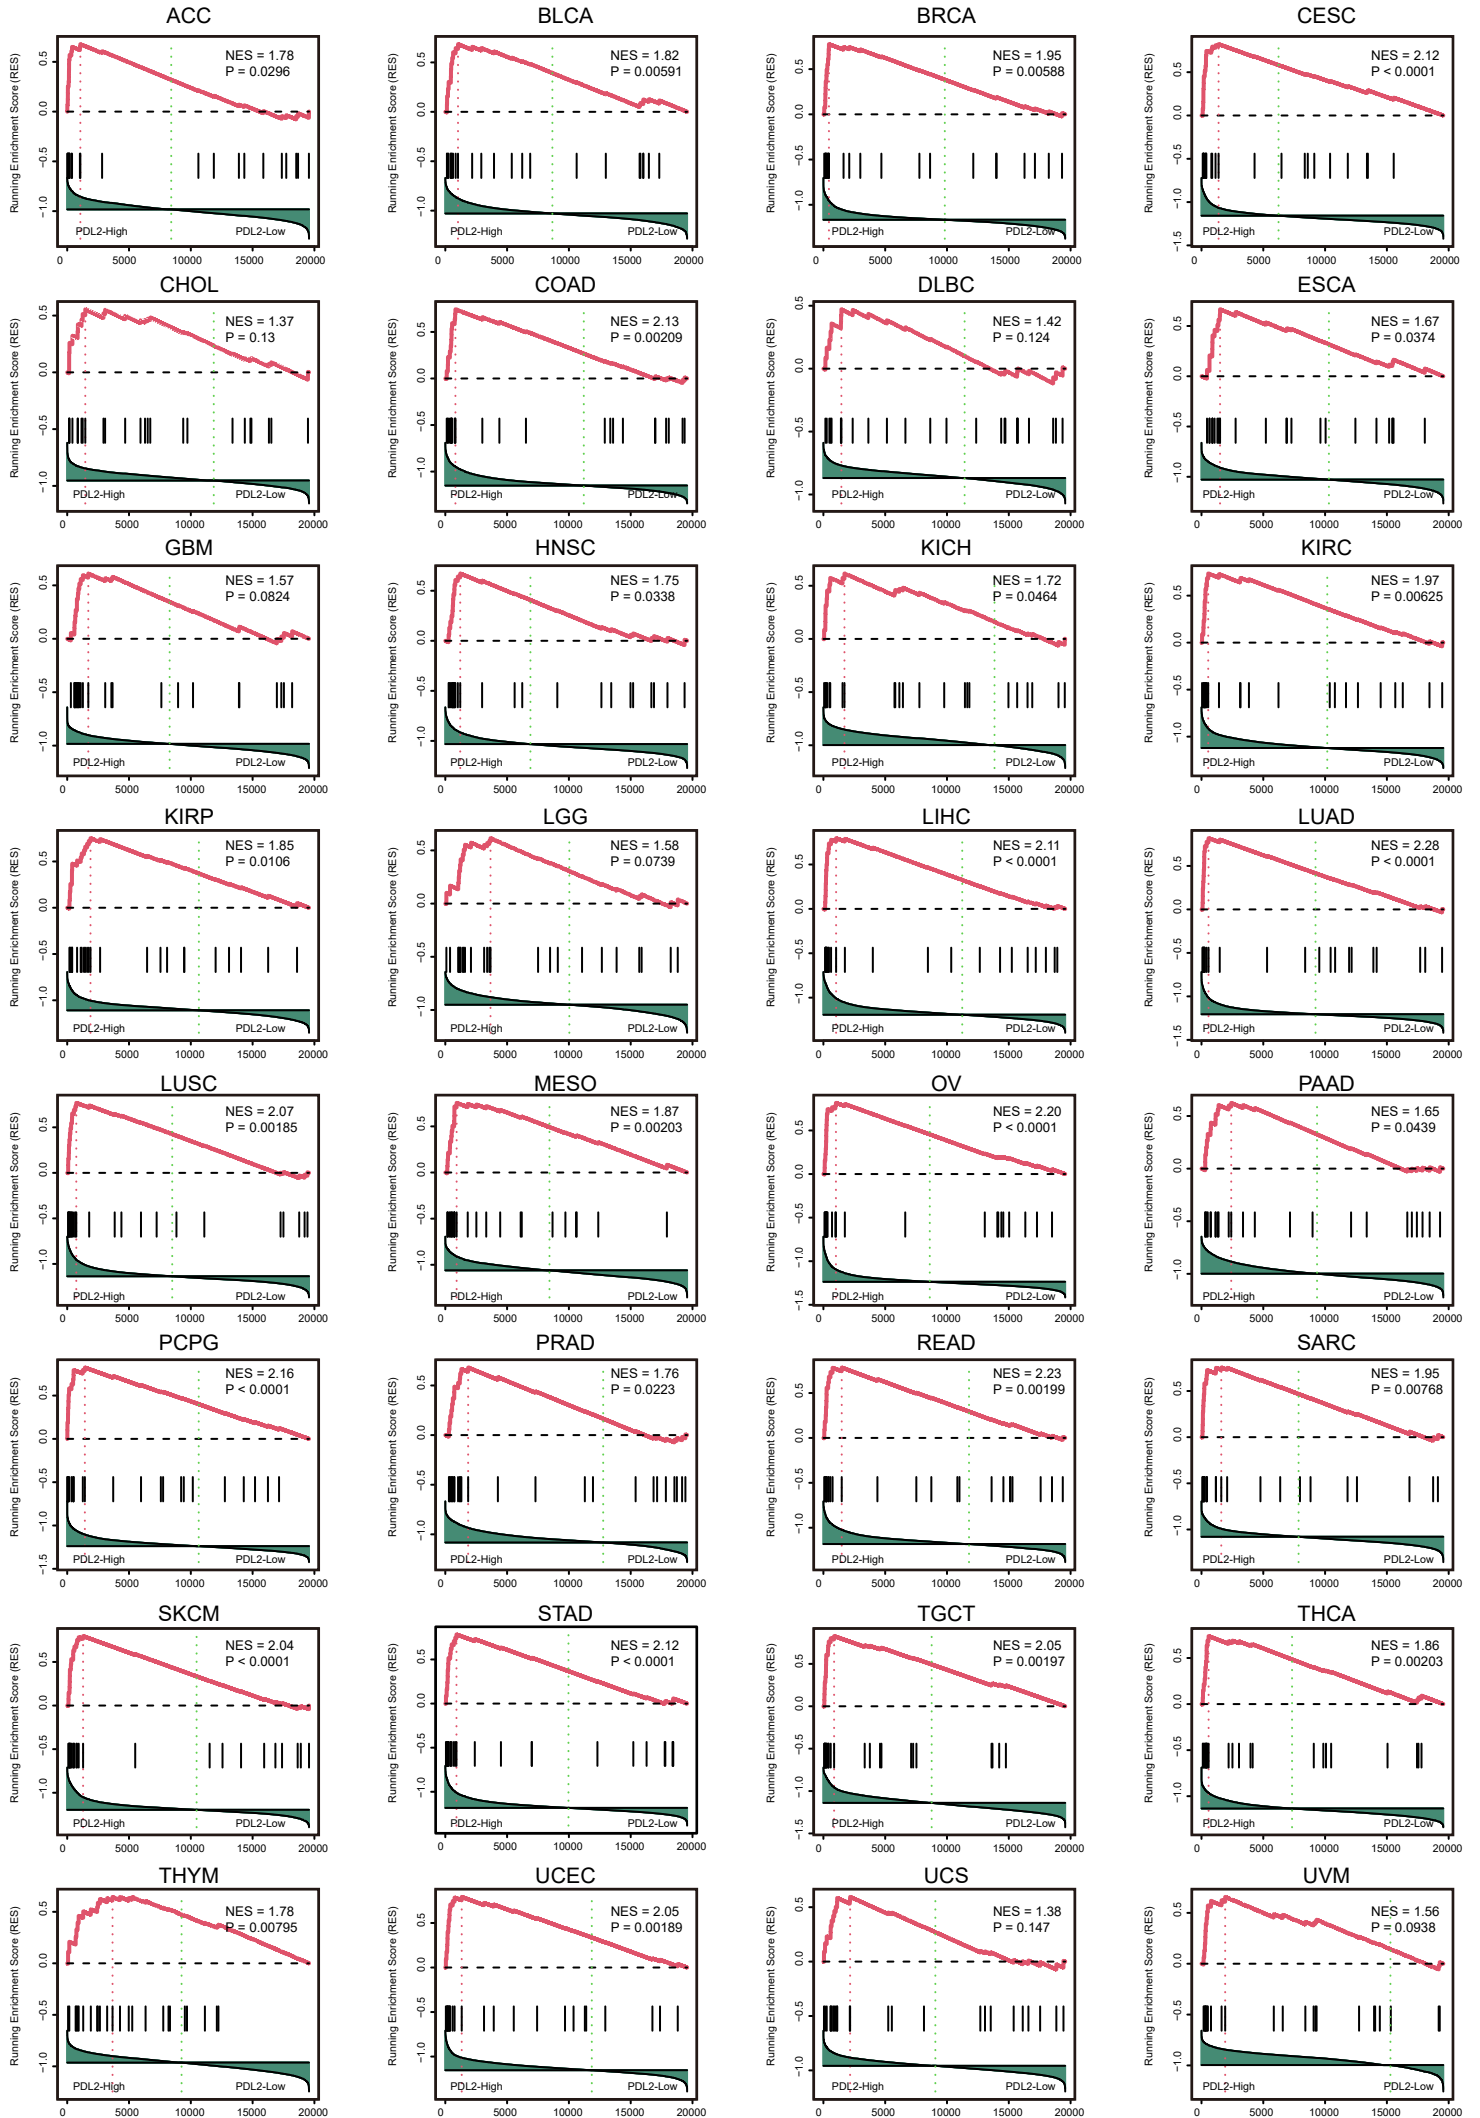

Supplement: f1 [file 9453692.f1.zip]

# Dendritic Cell Signature

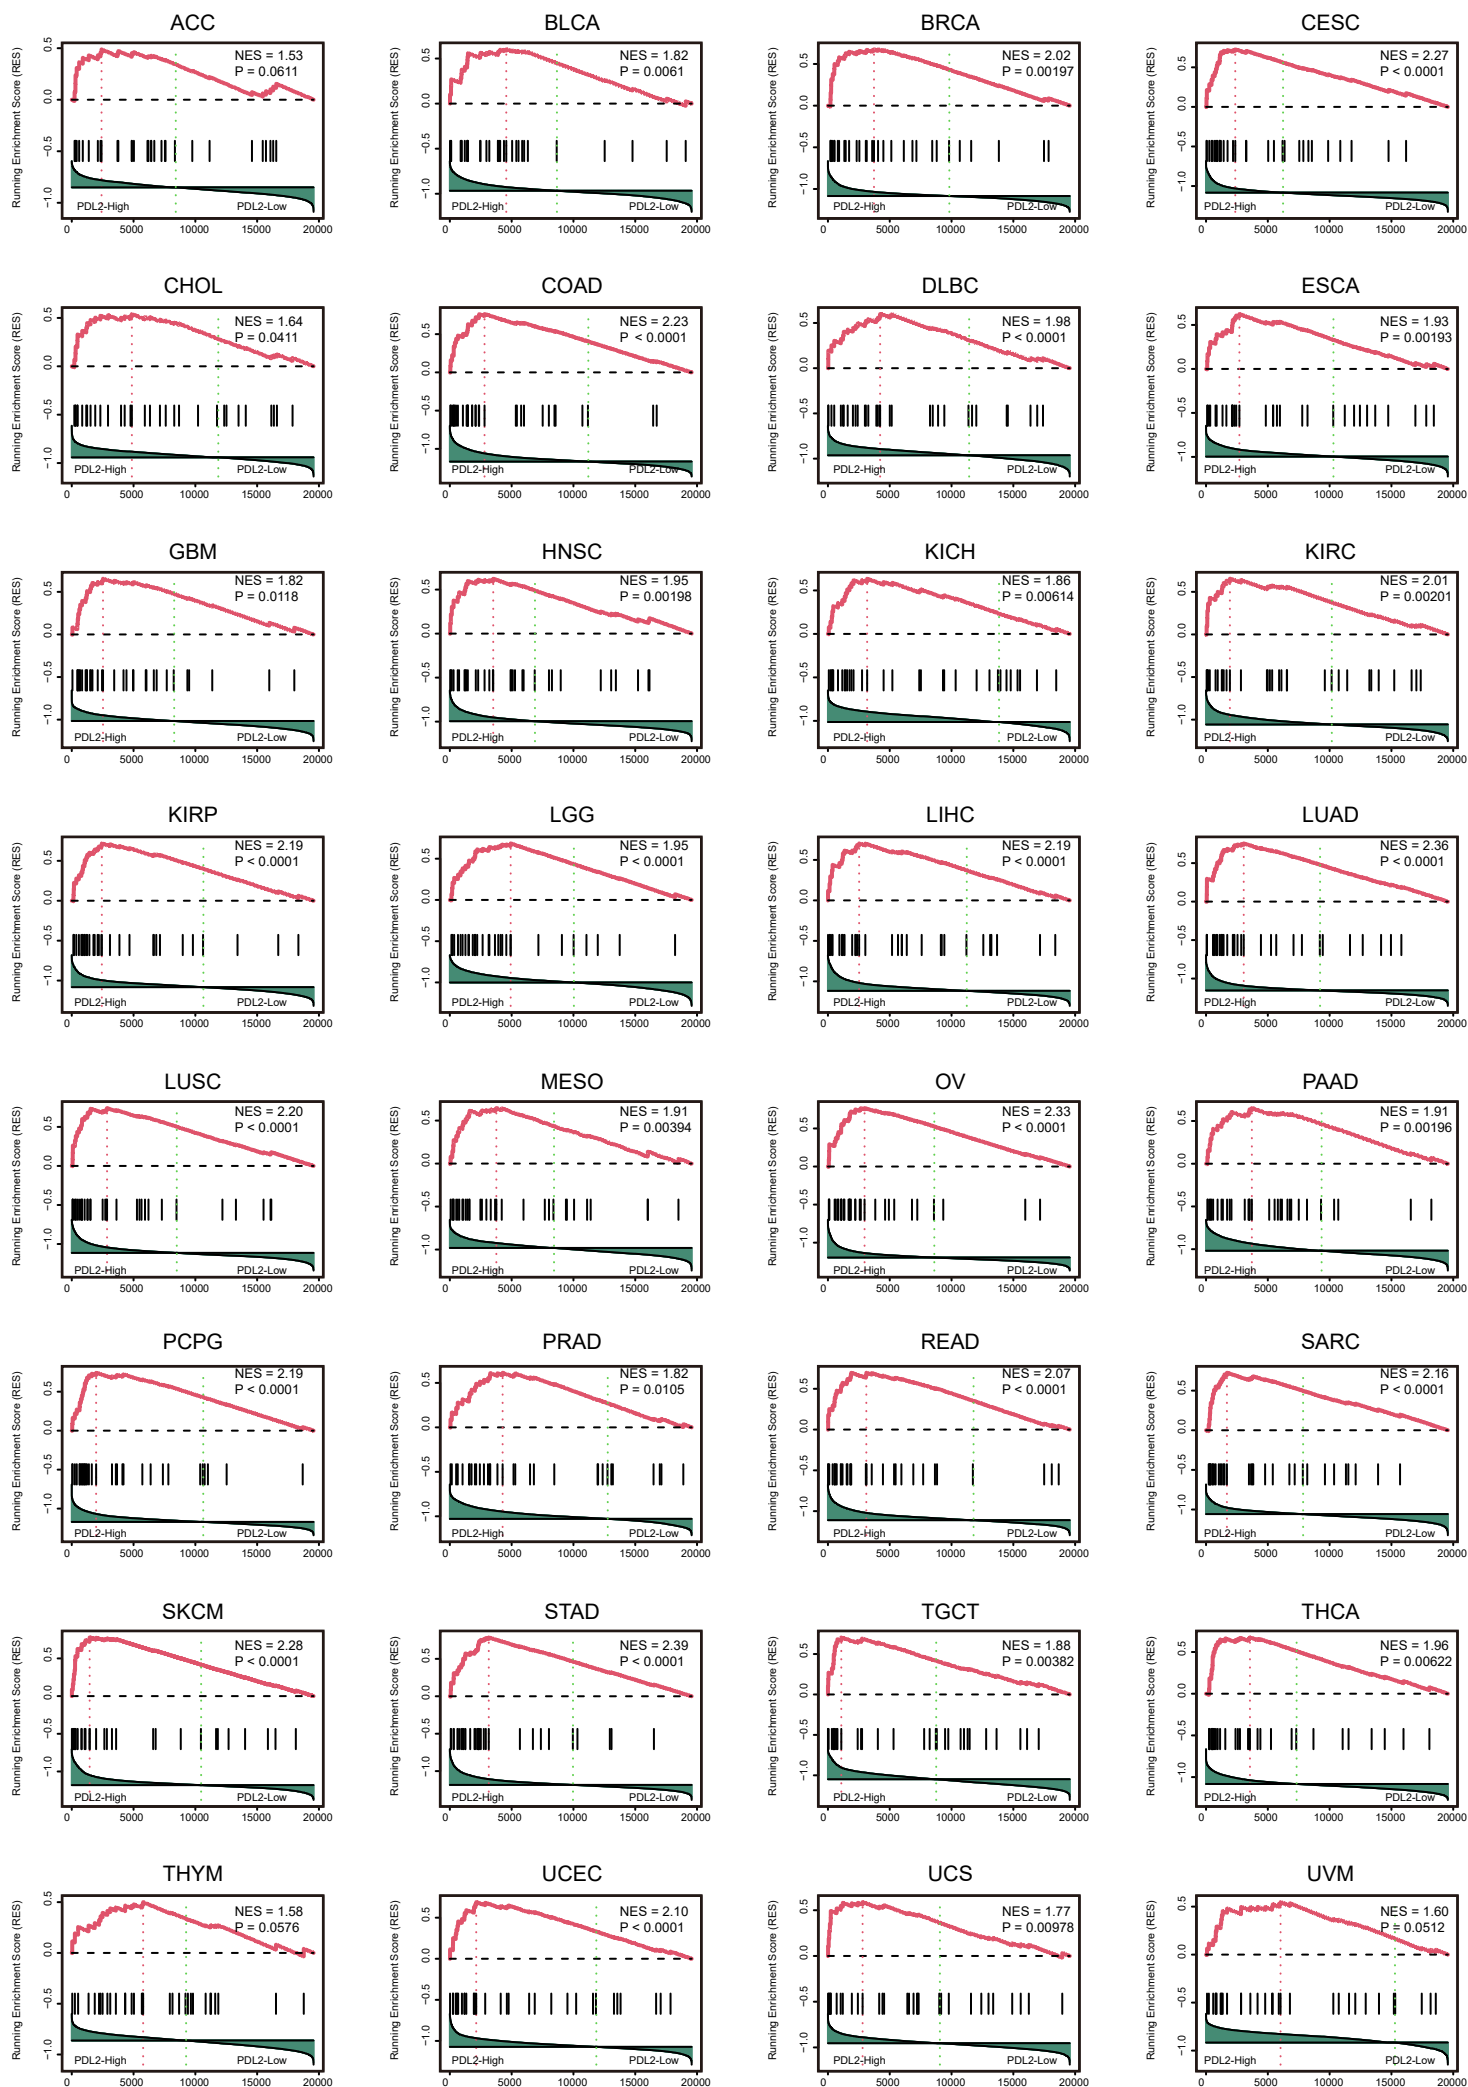

Supplement: f1 [file 9453692.f1.zip]

# Mark IFN- $\gamma$ Signature

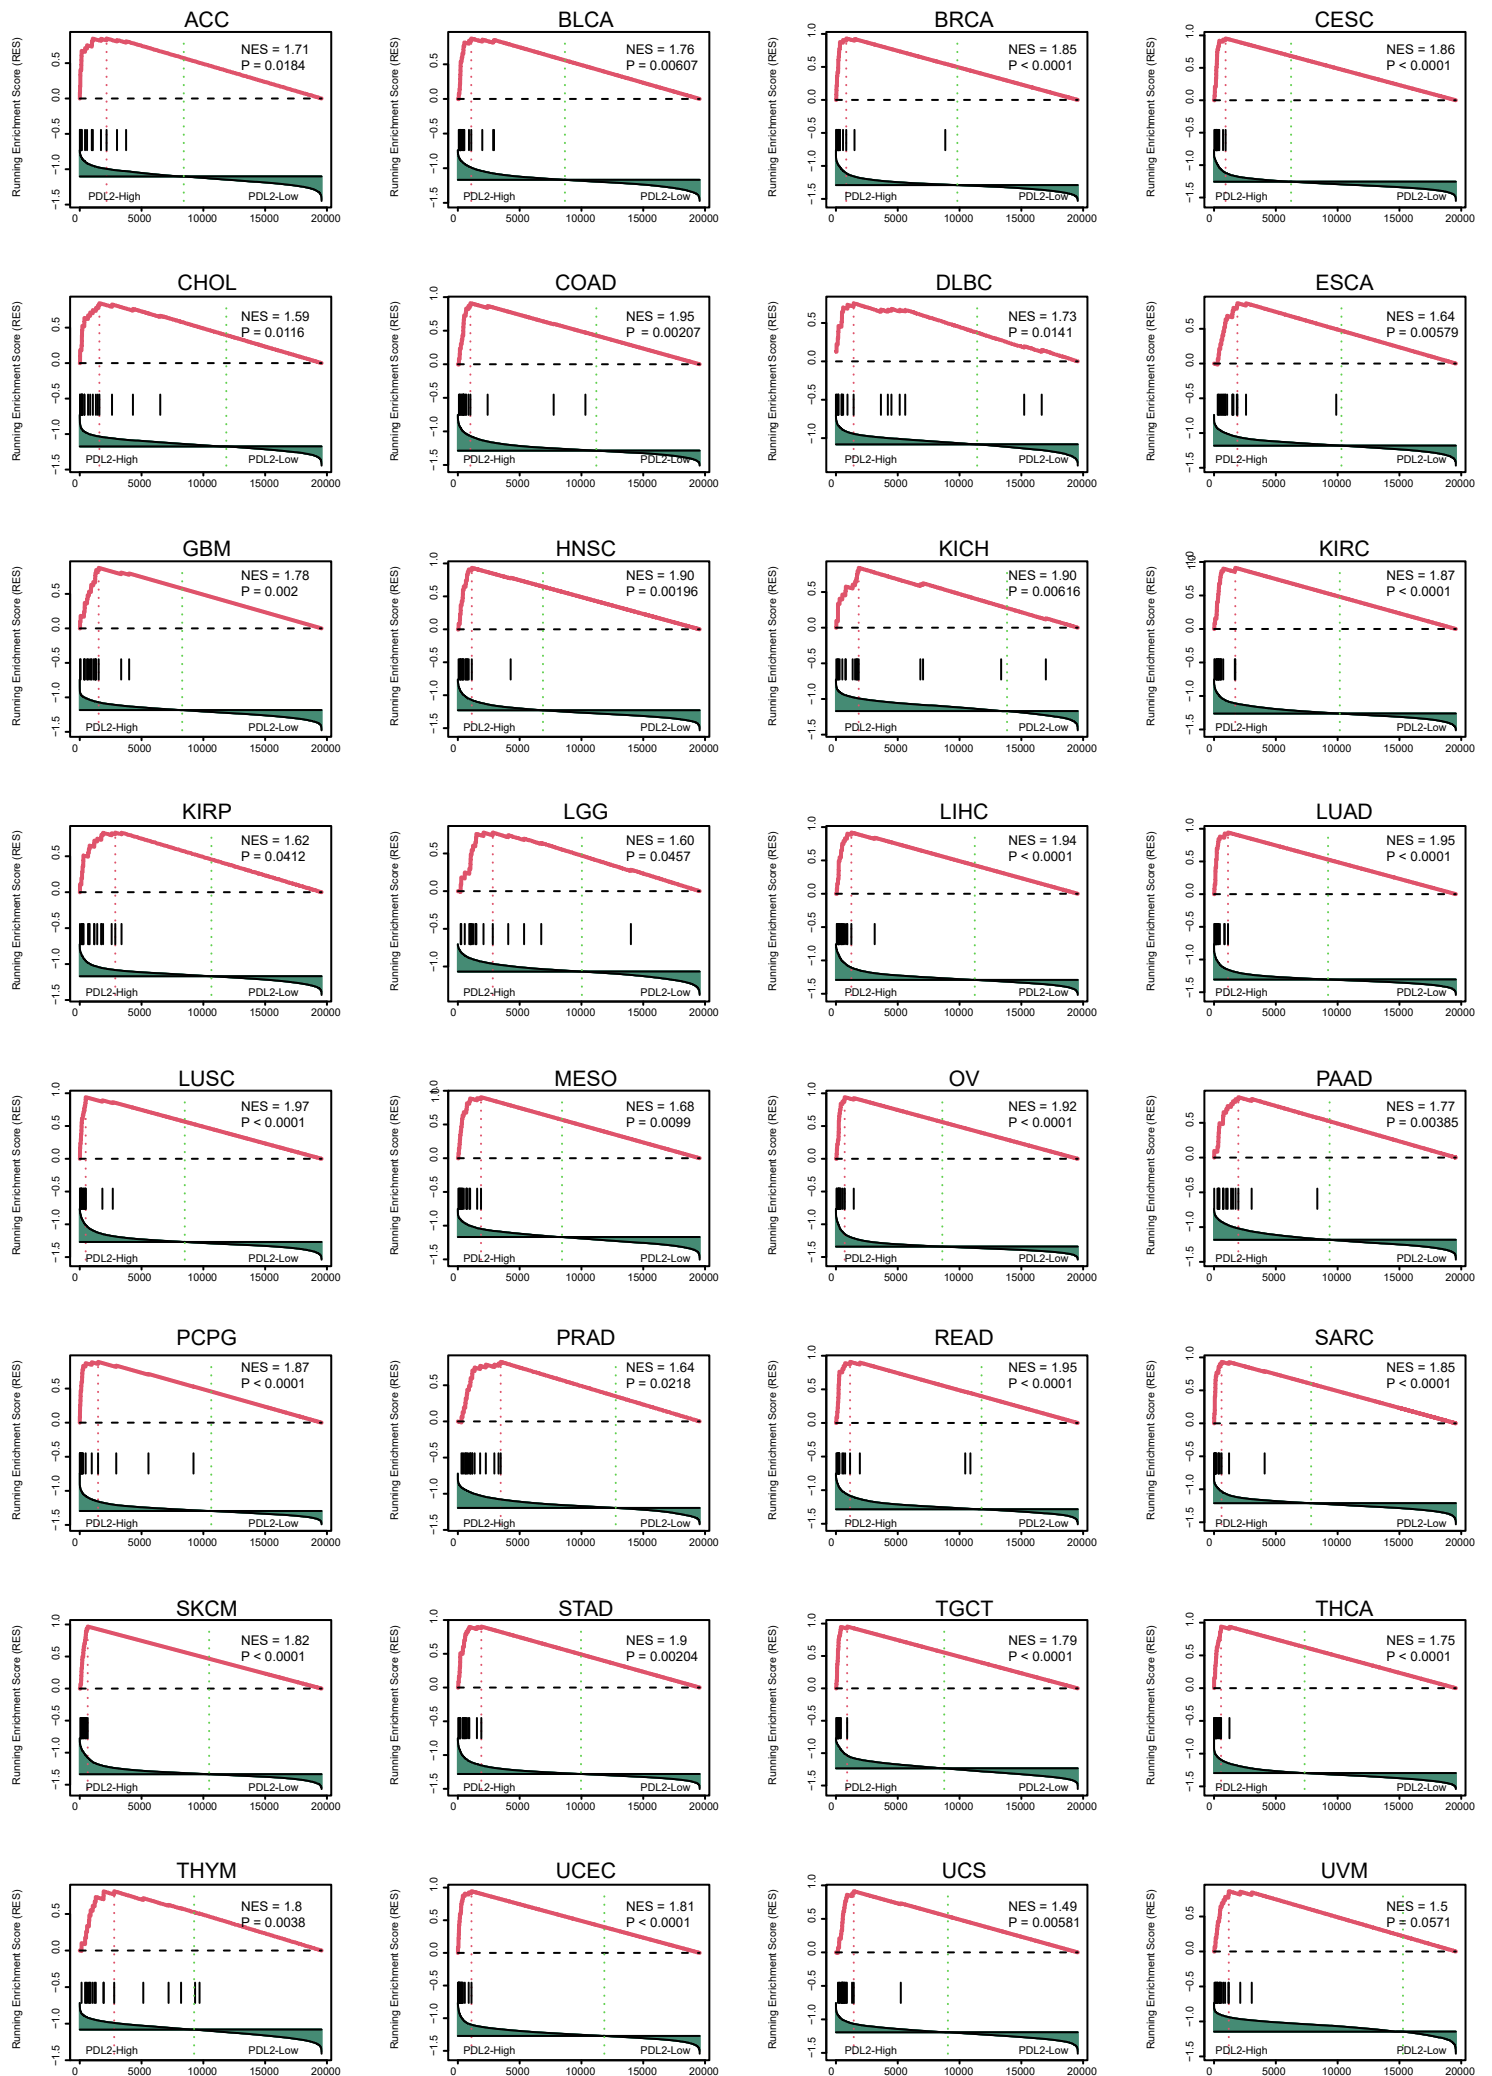

Supplement: f1 [file 9453692.f1.zip]

# Louis IFN- $\gamma$ Signature

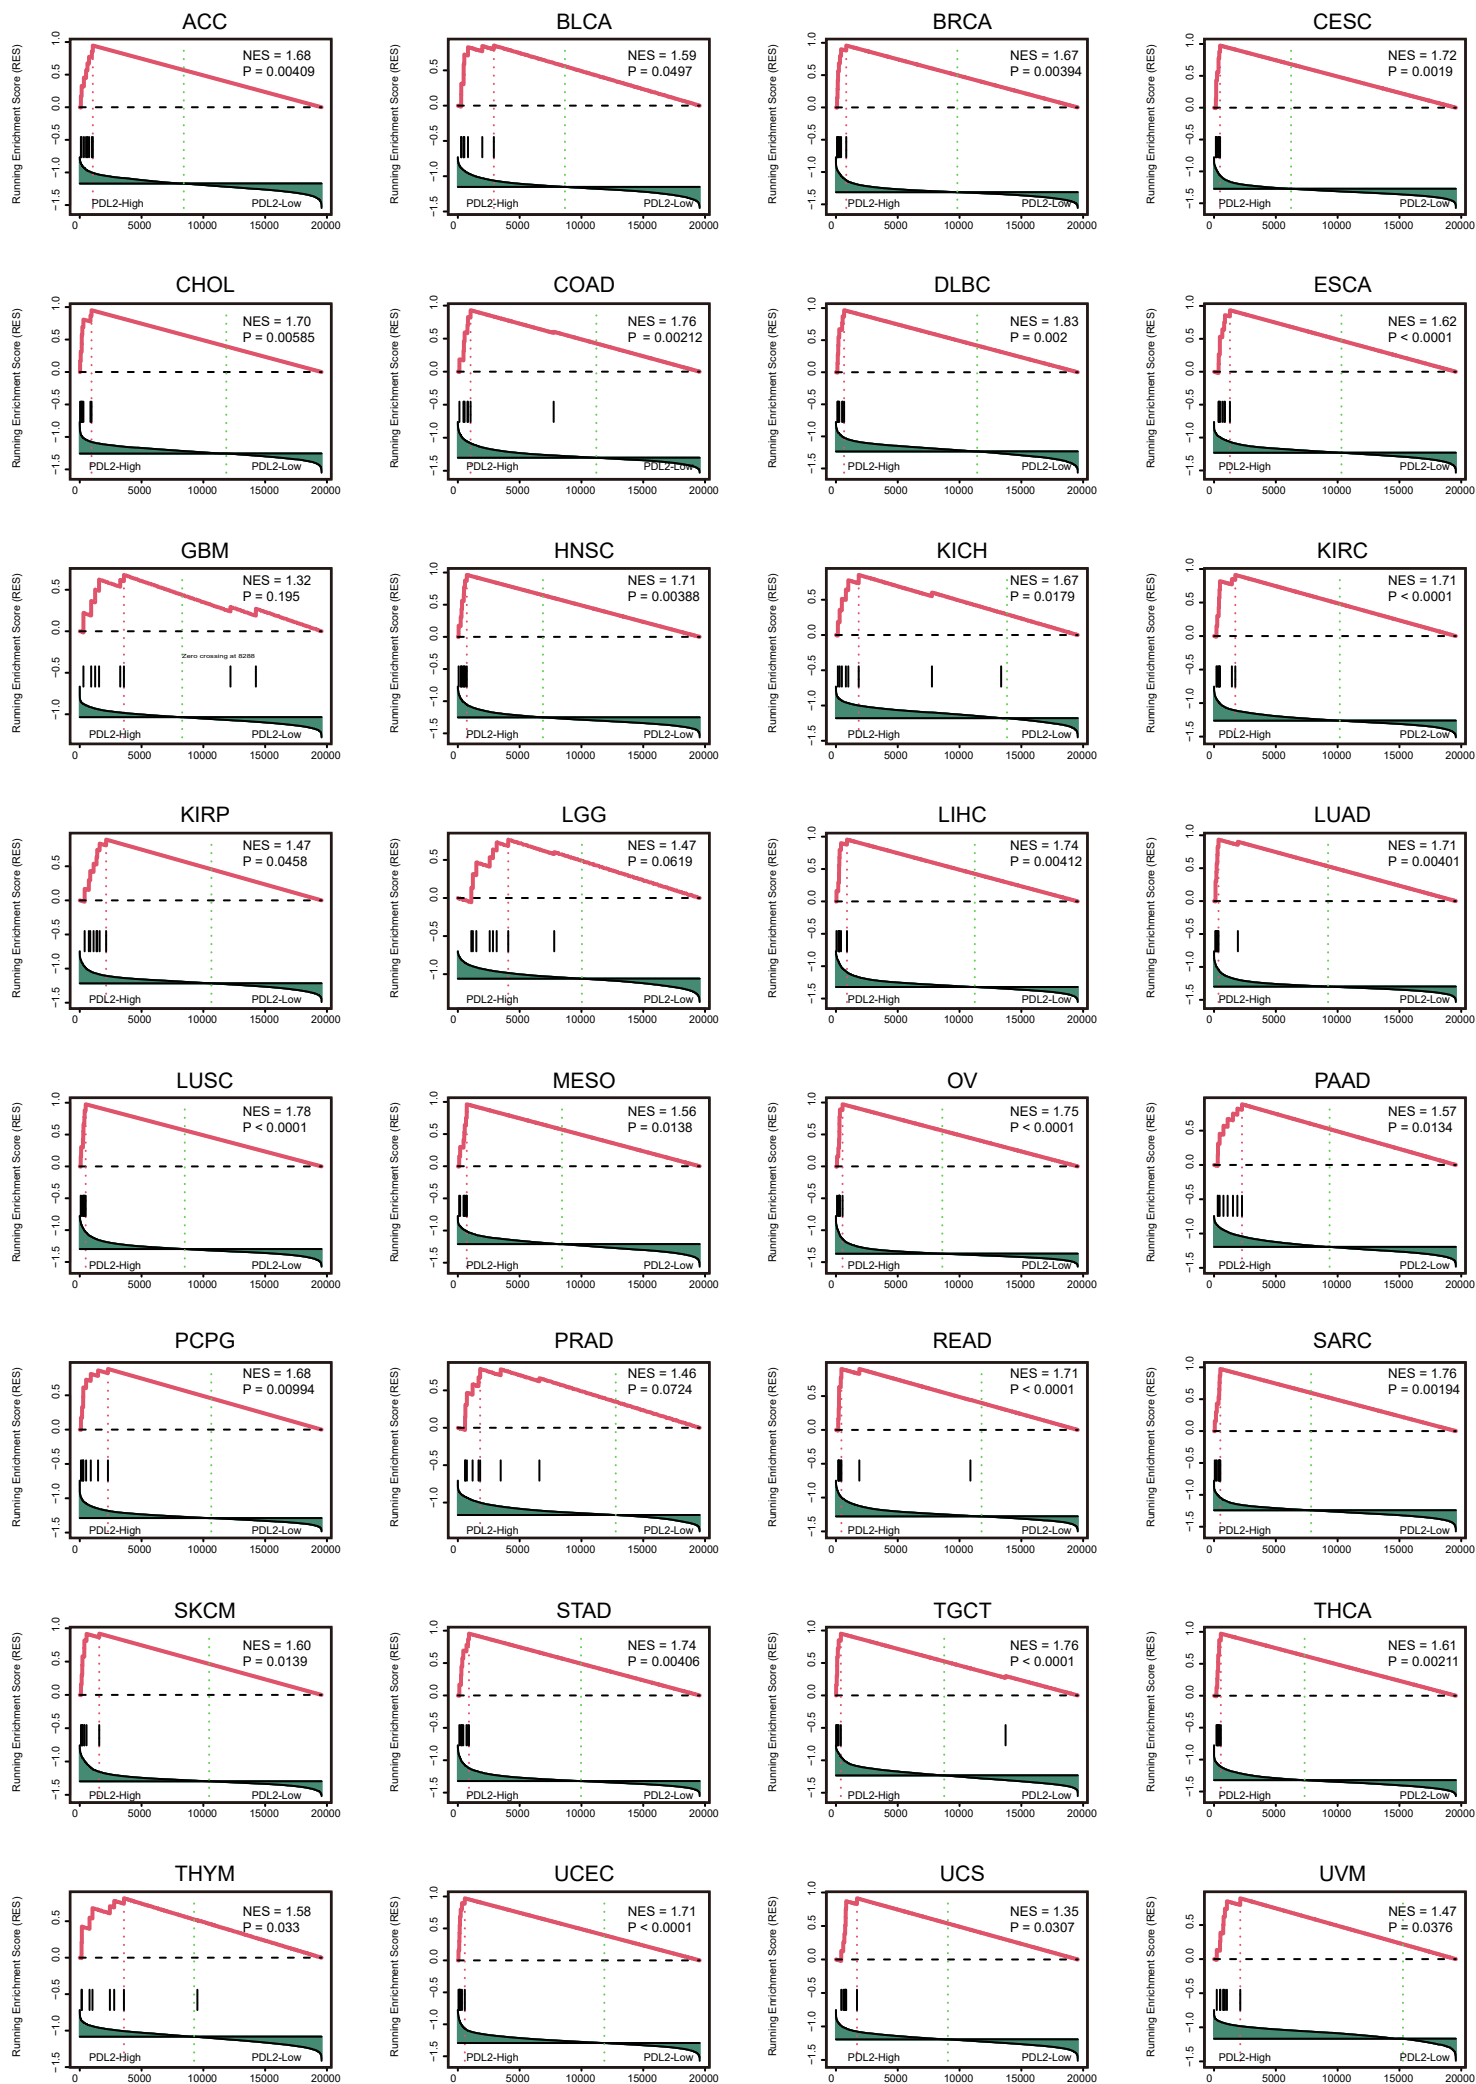

Supplement: f1 [file 9453692.f1.zip]

## Survival analysis of PDL2 in TCGA Pooled Cohort

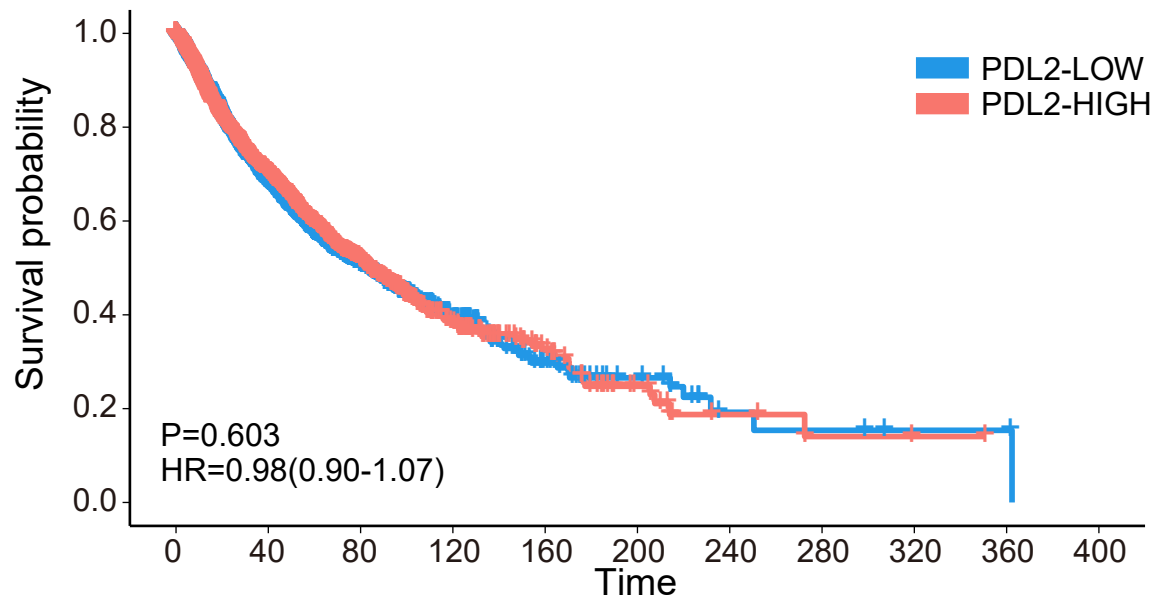

Supplement: f1 [file 9453692.f1.zip]

# Type 1 Helper Cell Signature

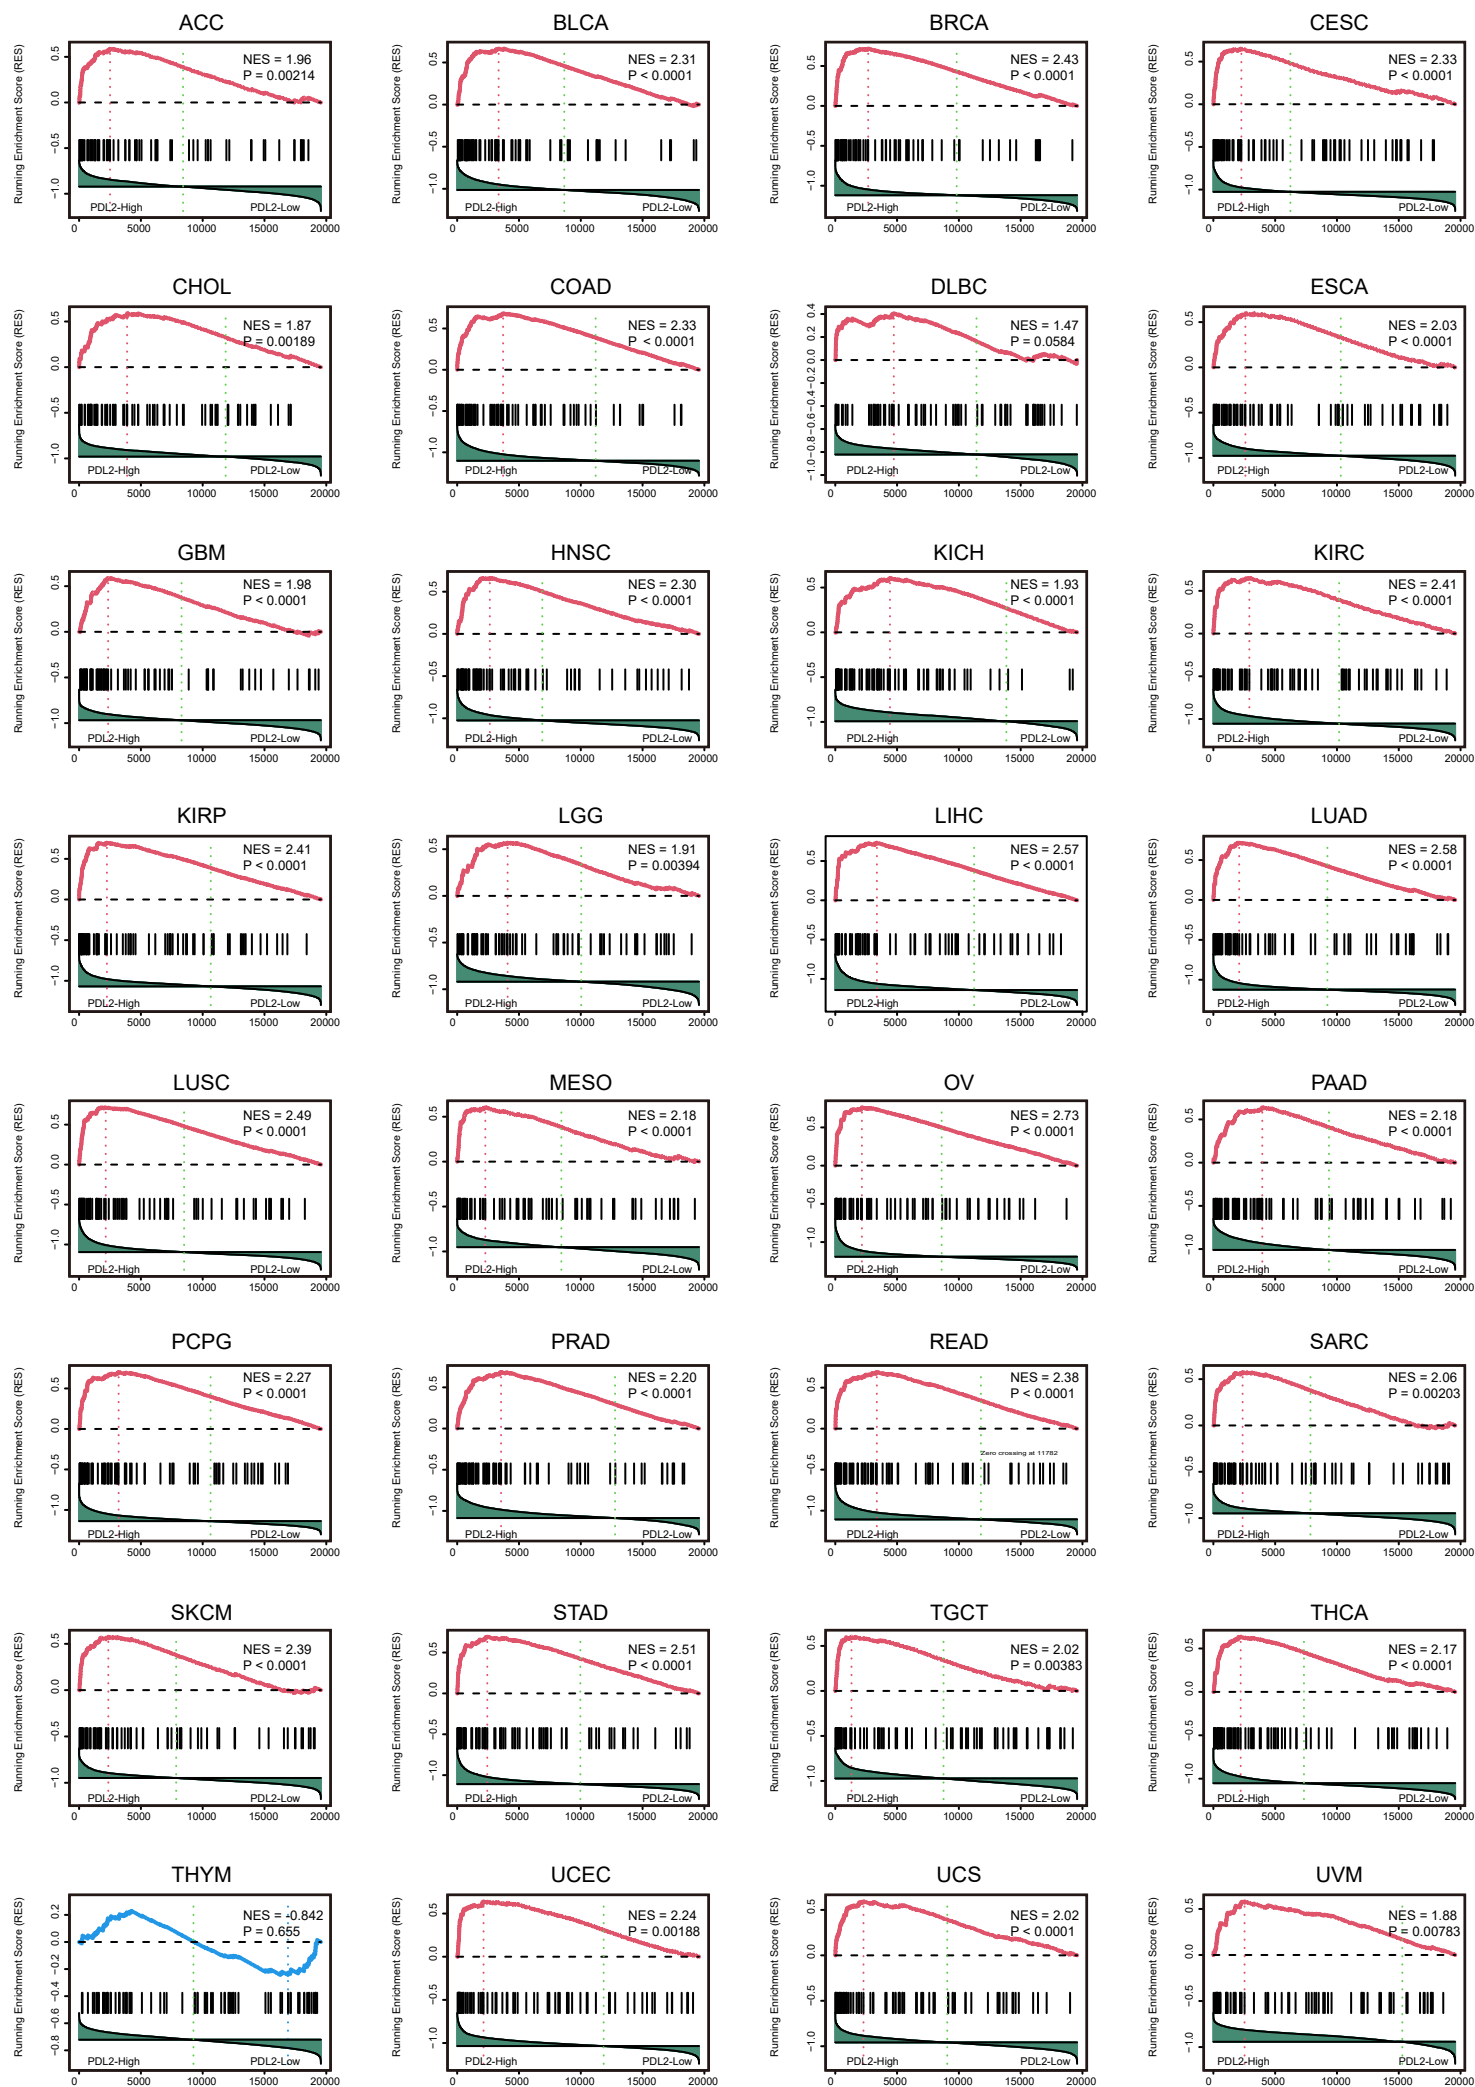

Supplement: f1 [file 9453692.f1.zip]

# Padmanee IFN- $\gamma$ Signature

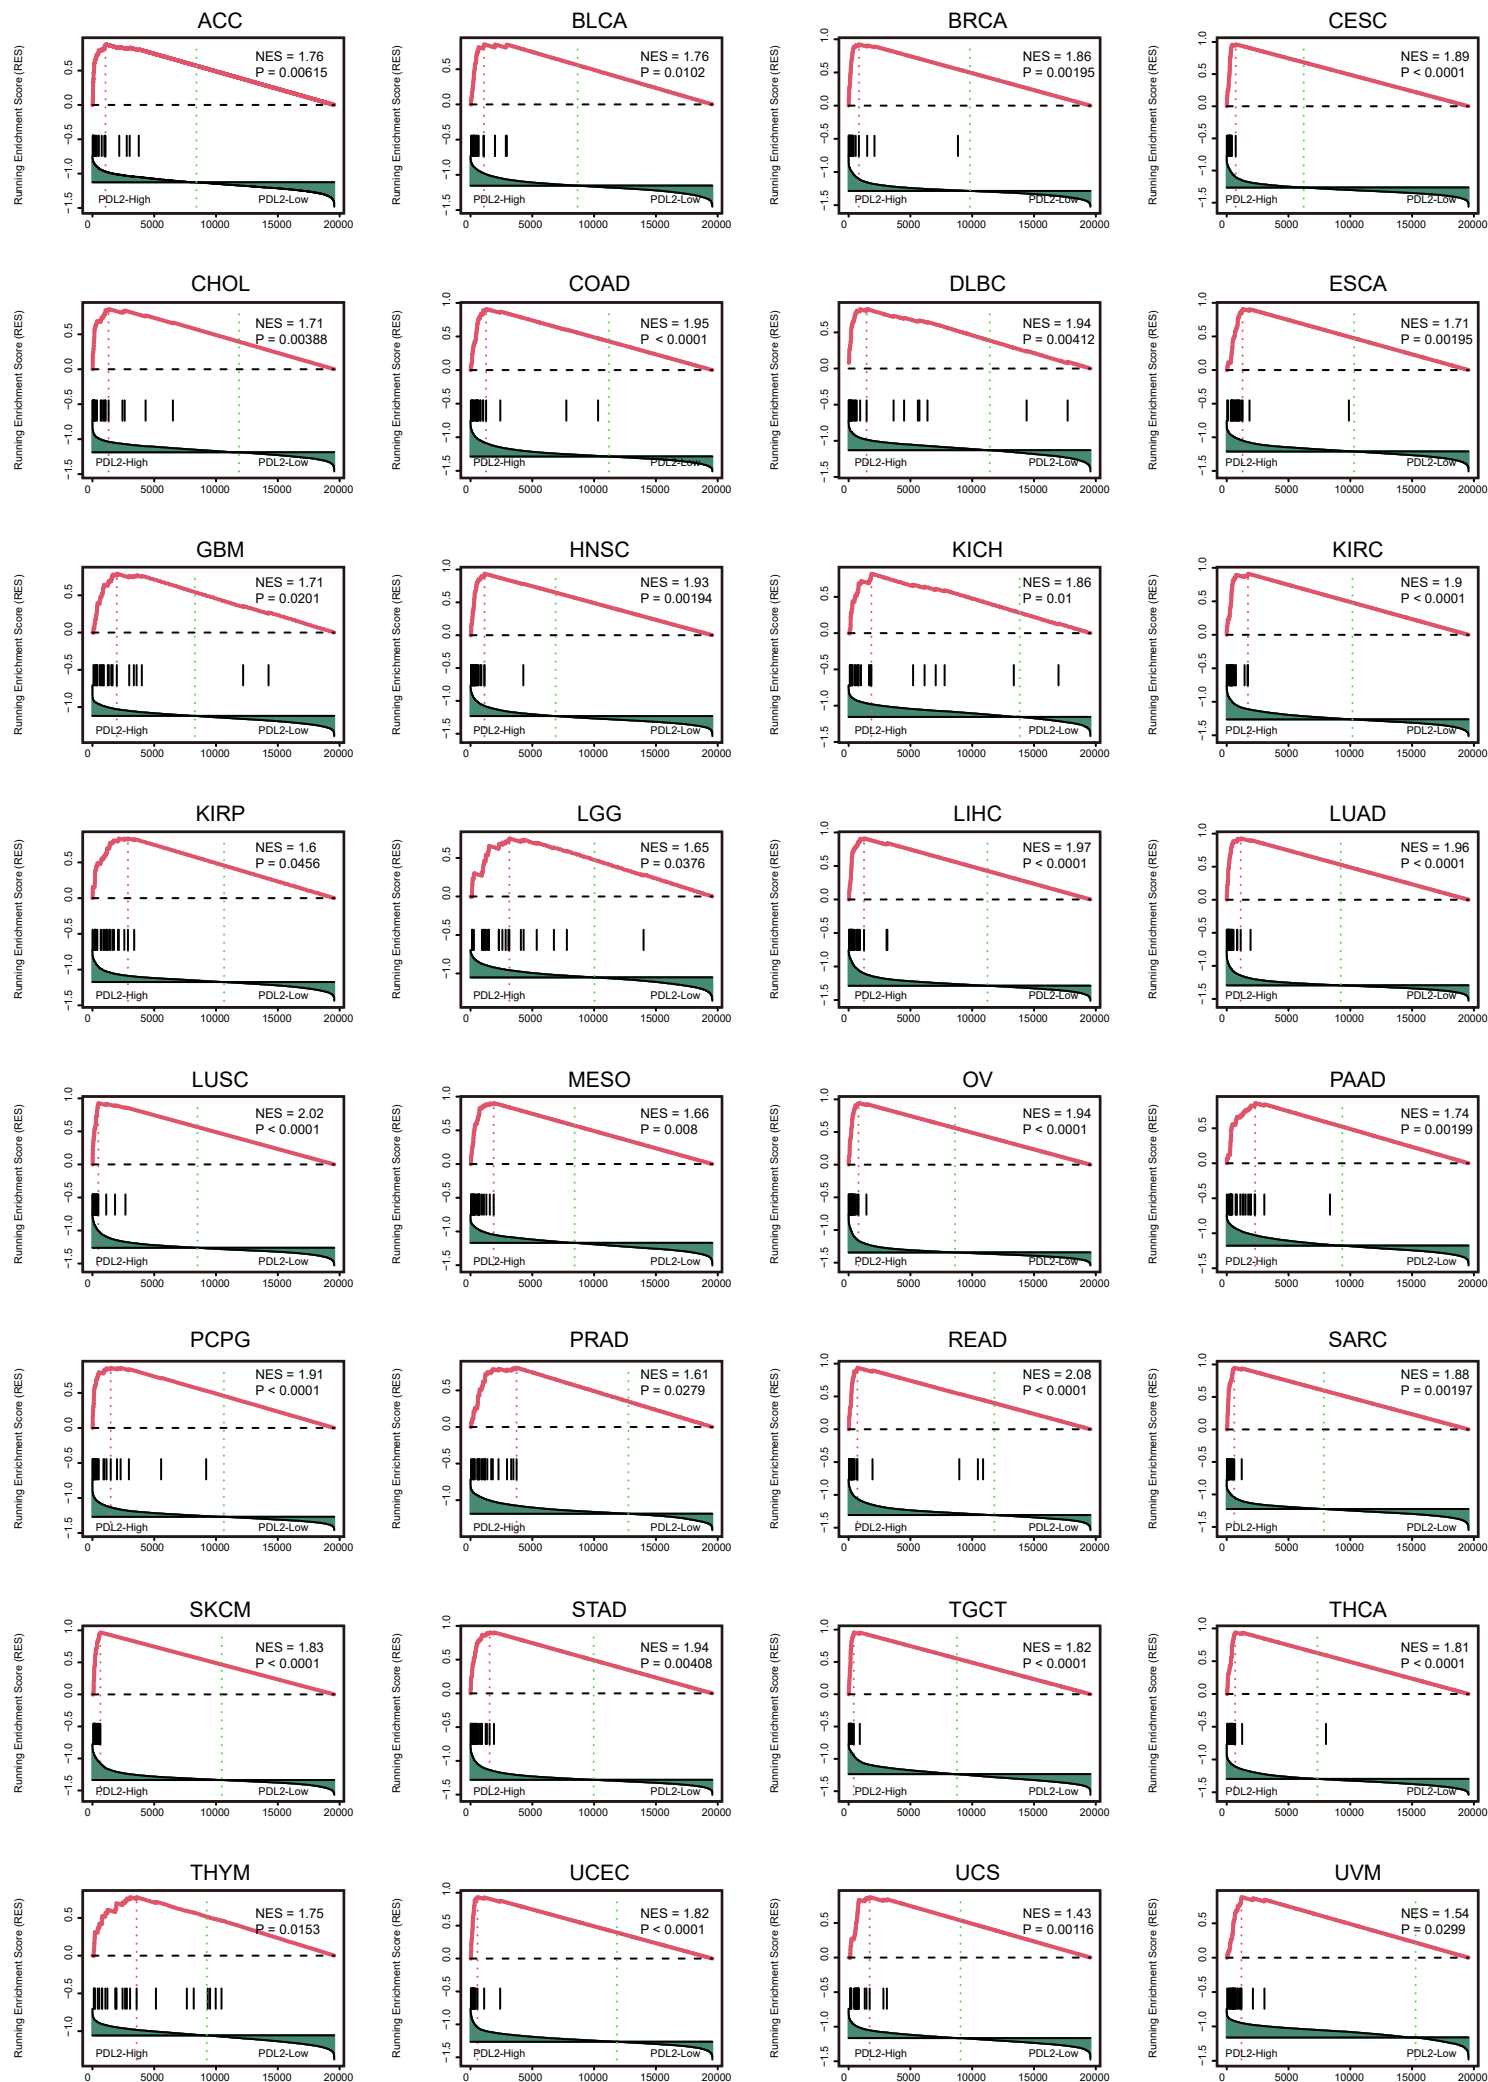

Supplement: f1 [file 9453692.f1.zip]
